# Supplementary material for: LocoMMotion: a prospective, non-interventional, multinational study of real-life current standards of care in patients with relapsed and/or refractory multiple myeloma
Source: PubMed Central journal article supplement (PMC9061296; doi:10.1038/s41375-022-01531-2), 2022-03-24
Supplement: 41375_2022_1531_MOESM1_ESM.pdf [file 41375_2022_1531_MOESM1_ESM.pdf]

## SUPPLEMENTARY APPENDIX

---

Mateos M-V, et al.\*

**LocoMMotion: a prospective, non-interventional, multinational study of real-life current standards of care in patients with relapsed and/or refractory multiple myeloma**

### SUPPLEMENTARY RESULTS

**Table S1.** SOC treatment regimens in patients (excluding subsequent therapy).

| SOC treatment                               | n (%)      |
|---------------------------------------------|------------|
| Number of regimens                          | 92         |
| Doublet drug combinations                   | 105 (42.3) |
| Combinations of $\geq 3$ drugs              | 160 (64.5) |
| Regimens (given to $\geq 4$ patients)       |            |
| Carfilzomib–dexamethasone                   | 34 (13.7)  |
| Pomalidomide–cyclophosphamide–dexamethasone | 33 (13.3)  |
| Pomalidomide–dexamethasone                  | 28 (11.3)  |
| Ixazomib–lenalidomide–dexamethasone         | 14 (5.6)   |
| Panobinostat–bortezomib–dexamethasone       | 11 (4.4)   |
| Bendamustine–bortezomib–dexamethasone       | 7 (2.8)    |
| Carfilzomib–cyclophosphamide–dexamethasone  | 7 (2.8)    |
| Elotuzumab–pomalidomide–dexamethasone       | 6 (2.4)    |
| Lenalidomide–dexamethasone                  | 6 (2.4)    |
| Doxorubicin–bortezomib–dexamethasone        | 5 (2.0)    |
| Carfilzomib–lenalidomide–dexamethasone      | 5 (2.0)    |
| Carfilzomib–pomalidomide–dexamethasone      | 5 (2.0)    |
| Melphalan                                   | 5 (2.0)    |
| Belantamab mafodotin                        | 4 (1.6)    |
| Bendamustine–prednisone                     | 4 (1.6)    |
| Cyclophosphamide–dexamethasone              | 4 (1.6)    |

SOC standard of care.

Patients could receive >1 regimen during SOC treatment. Percentages are calculated with the number of patients in the all-treated analysis set as the denominator.

---

\* *Corresponding author.* Maria-Victoria Mateos, Paseo de la Transición s/n, Hospital Clinico Universitario de Salamanca, Department of Hematology, Salamanca 37007, Spain; [mvmateos@usal.es](mailto:mvmateos@usal.es).

**Table S2.** Summary of subsequent antimyeloma therapy.

|                                             | <b>N=248</b>     |
|---------------------------------------------|------------------|
| Any subsequent antimyeloma therapy, n (%)   | 123 (49.6)       |
| 1 therapy                                   | 78 (31.5)        |
| 2 therapies                                 | 18 (7.3)         |
| 3 therapies                                 | 18 (7.3)         |
| >3 therapies                                | 9 (3.6)          |
| Months on subsequent antimyeloma therapy    |                  |
| Median (range)                              | 2.8 (0.03–12.29) |
| Therapy, n (%)                              |                  |
| Glucocorticoids                             | 93 (37.5)        |
| Alkylating agents                           | 67 (27.0)        |
| Proteasome inhibitor                        | 54 (21.8)        |
| Immunomodulatory drug                       | 53 (21.4)        |
| Antibody–drug conjugates                    | 37 (14.9)        |
| Anti-CD38 antibodies                        | 21 (8.5)         |
| Anthracyclines                              | 16 (6.5)         |
| Selective inhibitor of nuclear export       | 14 (5.6)         |
| Topoisomerase inhibitor                     | 10 (4.0)         |
| Anti-SLAMF7 monoclonal antibody             | 9 (3.6)          |
| Other antineoplastic agent                  | 8 (3.2)          |
| Bispecific antibodies                       | 6 (2.4)          |
| BCL-2 inhibitor                             | 5 (2.0)          |
| Mitotic inhibitor                           | 5 (2.0)          |
| Antimetabolite                              | 3 (1.2)          |
| Histone deacetylase (HDAC) inhibitor        | 3 (1.2)          |
| Investigational antineoplastic drug         | 1 (0.4)          |
| Selective immunosuppressant                 | 1 (0.4)          |
| BCMA-targeted CAR-T                         | 0 (0.0)          |
| Number of regimens                          | 99               |
| Regimen <sup>a</sup> (given to ≥4 patients) |                  |
| Belantamab mafodotin                        | 31 (12.5)        |
| Pomalidomide–cyclophosphamide–dexamethasone | 8 (3.2)          |
| Thalidomide–cyclophosphamide–dexamethasone  | 7 (2.8)          |
| Carfilzomib–dexamethasone                   | 6 (2.4)          |
| Monoclonal antibodies <sup>b</sup>          | 6 (2.4)          |
| Bendamustine                                | 5 (2.0)          |
| Isatuximab–pomalidomide–dexamethasone       | 5 (2.0)          |
| Belantamab mafodotin–dexamethasone          | 4 (1.6)          |
| Selinexor–bortezomib–dexamethasone          | 4 (1.6)          |

|                                            |         |
|--------------------------------------------|---------|
| Carfilzomib–cyclophosphamide–dexamethasone | 4 (1.6) |
| Carfilzomib–daratumumab–dexamethasone      | 4 (1.6) |
| Elotuzumab–pomalidomide–dexamethasone      | 4 (1.6) |
| Ixazomib–lenalidomide–dexamethasone        | 4 (1.6) |
| Selinexor–dexamethasone                    | 4 (1.6) |

*BCMA* B-cell maturation antigen.

<sup>a</sup>Patients could receive >1 regimen.

<sup>b</sup>Monoclonal antibodies received by 6 patients in subsequent lines were investigational bispecific antibodies: teclistamab, talquetamab, and AMG701.

**Table S3.** Cytopenic TEAEs based on adverse event reporting and laboratory values.

| <b>Cytopenic TEAE</b>              | <b>Total reported (N=248)</b>          |                                        | <b>Based on laboratory data during SOC therapy (N=244)</b> |
|------------------------------------|----------------------------------------|----------------------------------------|------------------------------------------------------------|
|                                    | <b>Any grade<br/>n (%)<sup>a</sup></b> | <b>Grade 3/4<br/>n (%)<sup>a</sup></b> | <b>Grade 3/4<br/>n (%)<sup>b</sup></b>                     |
| Total patients with cytopenic TEAE | 106 (42.7)                             | 85 (34.3)                              | 158 (64.8)                                                 |
| Anemia                             | 64 (25.8)                              | 27 (10.9)                              | 46 (18.9)                                                  |
| Thrombocytopenia                   | 57 (23.0)                              | 44 (17.7)                              | 76 (31.1)                                                  |
| Neutropenia                        | 39 (15.7)                              | 33 (13.3)                              | 62 (25.4)                                                  |
| Leukopenia                         | 18 (7.3)                               | 12 (4.8)                               | 58 (23.8)                                                  |
| Lymphopenia                        | 16 (6.5)                               | 14 (5.6)                               | 97 (39.8)                                                  |

SOC standard of care, TEAE treatment-emergent adverse event.

<sup>a</sup>Percentages are calculated with the all-treated analysis set as denominator.

<sup>b</sup>Percentages are calculated with the number of all treated patients with post-baseline laboratory data as the denominator.
